# Supplementary material for: Discrepancy between left ventricular hypertrophy by echocardiography and electrocardiographic hypertrophy: clinical characteristics and outcomes
Source: HighWire-hosted journal article supplement (doi:10.1136/openhrt-2021-001765), 2021-09-01
Supplement: openhrt-2021-001765supp001_data_supplement.pdf [file openhrt-2021-001765supp001_data_supplement.pdf]

**Supplemental materials for****Discrepancy between left ventricular hypertrophy by echocardiography and electrocardiographic hypertrophy: clinical characteristics and outcomes**

**Authors:** Yuta Seko<sup>1</sup> ; Takao Kato<sup>1</sup> ; Yuhei Yamaji<sup>2</sup> ; Yoshisumi Haruna<sup>2</sup> ; Eisaku

Nakane<sup>2</sup> ; Tetsuya Haruna<sup>2</sup> ; Moriaki Inoko<sup>2</sup> Affiliations: <sup>1</sup>Department of

Cardiovascular Medicine, Kyoto University Graduate School of Medicine, Kyoto, Japan

<sup>2</sup>Cardiovascular Center, The Tazuke Kofukai Medical Research Institute, Kitano

Hospital, Osaka, Japan

Corresponding Author: Takao Kato, MD. Department of Cardiovascular Medicine,

Kyoto University Graduate School of Medicine, Japan 54 Shogoin Kawahara-cho,

Sakyo-ku, Kyoto. 606-8507, Japan Tel: +81-75-751-4254; FAX: +81-75-751-3289 E-

mail: tkato75@kuhp.kyoto-u.ac.jp

**Supplementary material content**

|                                    |                   |
|------------------------------------|-------------------|
| <b>Supplemental Tables</b>         | <b>Page 3-14</b>  |
| <b>Supplemental Figures</b>        | <b>Page 15-16</b> |
| <b>Supplemental Figure legends</b> | <b>Page 17</b>    |

**Supplemental Table 1. Clinical outcomes in each component of MACE**

|                                       | Both ECG- and echo-based LVH<br>N of patients with event/N of patients at risk<br>(Cumulative 3-year incidence [%]) | Only echo-based LVH<br>N of patients with event/N of patients at risk<br>(Cumulative 3-year incidence [%]) | Only ECG-based LVH<br>N of patients with event/N of patients at risk<br>(Cumulative 3-year incidence [%]) | No LVH<br>N of patients with event/N of patients at risk<br>(Cumulative 3-year incidence [%]) |
|---------------------------------------|---------------------------------------------------------------------------------------------------------------------|------------------------------------------------------------------------------------------------------------|-----------------------------------------------------------------------------------------------------------|-----------------------------------------------------------------------------------------------|
| Heart failure                         | 10/131 (9.4)                                                                                                        | 12/156 (10.0)                                                                                              | 13/409 (4.3)                                                                                              | 41/2516 (2.3)                                                                                 |
| Myocardial infarction                 | 1/131 (1.0)                                                                                                         | 0/156 (0)                                                                                                  | 2/409 (0.6)                                                                                               | 6/2516 (0.3)                                                                                  |
| Unstable angina pectoris              | 3/131 (3.1)                                                                                                         | 5/156 (4.1)                                                                                                | 3/409 (1.0)                                                                                               | 15/2516 (0.8)                                                                                 |
| Aorta and peripheral vascular disease | 4/131 (3.4)                                                                                                         | 3/156 (2.6)                                                                                                | 6/409 (1.7)                                                                                               | 18/2516 (1.0)                                                                                 |

|                     |             |             |             |               |
|---------------------|-------------|-------------|-------------|---------------|
|                     |             |             |             |               |
| Cerebral infarction | 3/131 (3.2) | 3/156 (2.9) | 7/409 (2.1) | 34/2516 (1.8) |
| Cerebral hemorrhage | 1/131 (1.2) | 3/156 (2.5) | 4/409 (1.3) | 8/2516 (0.4)  |

MACE=major adverse cardiovascular events

**Supplemental Table 2. Sensitivity analysis using BMI and LVEF as the continuous variable in the multivariable Cox proportional hazard models**

|                                        | Variables                    | Adjusted            |         |
|----------------------------------------|------------------------------|---------------------|---------|
|                                        |                              | HR<br>(95% CI)      | P value |
| Primary endpoint                       |                              |                     |         |
| A composite of all-cause death or MACE | Both ECG- and echo-based LVH | 1.53<br>(1.09-2.16) | 0.01    |
|                                        | Only echo-based LVH          | 1.66<br>(1.22-2.27) | 0.001   |
|                                        | Only ECG-based LVH           | 1.09<br>(0.85-1.41) | 0.49    |
|                                        | No LVH                       | 1 (reference)       |         |
| Secondary endpoints                    |                              |                     |         |

|                 |                              |                     |       |
|-----------------|------------------------------|---------------------|-------|
| All-cause death | Both ECG- and echo-based LVH | 1.28<br>(0.80-2.05) | 0.30  |
|                 | Only echo-based LVH          | 1.14<br>(0.73-1.78) | 0.56  |
|                 | Only ECG-based LVH           | 0.93<br>(0.67-1.29) | 0.68  |
|                 | No LVH                       | 1 (reference)       |       |
| MACE            | Both ECG- and echo-based LVH | 1.78<br>(1.16-2.74) | 0.008 |
|                 | Only echo-based LVH          | 1.80<br>(1.19-2.73) | 0.005 |
|                 | Only ECG-based LVH           | 1.37<br>(0.98-1.92) | 0.07  |
|                 | No LVH                       | 1 (reference)       |       |

CI=confidence interval, HR=hazard ratio, MACE=major adverse cardiovascular events

**Supplemental Table 3. Patient characteristics using Cornell voltage for ECG-LVH**

|                                 | Total<br>(n=3212) | Both ECG- and<br>Echo-based LVH<br>(n=101) | Only<br>Echo-based LVH<br>(n=186) | Only<br>ECG-based LVH<br>(n=266) | No LVH<br>(n=2659) | P value | Total N |
|---------------------------------|-------------------|--------------------------------------------|-----------------------------------|----------------------------------|--------------------|---------|---------|
| <b>Clinical characteristics</b> |                   |                                            |                                   |                                  |                    |         |         |
| Age*, years                     | 64.5 ± 15.9       | 68.6 ± 13.4                                | 70.1 ± 13.4                       | 68.7 ± 13.7                      | 63.5 ± 16.2        | <0.001  | 3212    |
| >70 years,                      | 1371 (42.7)       | 52 (51.5)                                  | 107 (57.5)                        | 147 (55.3)                       | 1065 (40.1)        | <0.001  | 3212    |
| Women*                          | 1512 (47.0)       | 71 (70.3)                                  | 87 (46.8)                         | 183 (68.8)                       | 1171 (44.0)        | <0.001  | 3212    |
| BMI kg/m <sup>2</sup>           | 23.2 ± 4.2        | 23.3 ± 5.2                                 | 23.9 ± 5.0                        | 23.1 ± 4.5                       | 23.1 ± 4.1         | 0.10    | 3202    |
| >25 kg/m <sup>2</sup> *         | 915 (28.6)        | 71 (70.3)                                  | 116 (62.4)                        | 184 (69.4)                       | 1916 (72.3)        | 0.03    | 3202    |
| Diabetes*                       | 983 (30.6)        | 37 (36.6)                                  | 84 (45.2)                         | 95 (35.7)                        | 767 (28.8)         | <0.001  | 3212    |
| Hypertension*                   | 1771 (55.1)       | 86 (85.1)                                  | 148 (79.6)                        | 174 (65.4)                       | 1363 (51.3)        | <0.001  | 3212    |
| Dyslipidemia*                   | 941 (29.3)        | 42 (41.6)                                  | 76 (40.9)                         | 87 (32.7)                        | 736 (27.7)         | <0.001  | 3212    |
| Ischemic heart disease*         | 979 (30.5)        | 45 (44.6)                                  | 82 (44.1)                         | 77 (28.9)                        | 775 (29.1)         | <0.001  | 3212    |
| Chronic kidney disease*         | 449 (14.0)        | 40 (39.6)                                  | 60 (32.3)                         | 42 (15.8)                        | 307 (11.5)         | <0.001  | 3212    |
| Atrial fibrillation*            | 267 (8.3)         | 10 (9.9)                                   | 19 (10.2)                         | 26 (9.8)                         | 212 (8.0)          | 0.50    | 3212    |
| <b>ECG characteristics</b>      |                   |                                            |                                   |                                  |                    |         |         |
| Heart rate, bpm                 | 71.6 ± 15.6       | 73.6 ± 15.5                                | 71.5 ± 16.3                       | 73.4 ± 17.3                      | 71.3 ± 15.3        | 0.11    | 3212    |
| QRS duration                    | 96.6 ± 9.0        | 102.1 ± 9.4                                | 99.2 ± 9.3                        | 98.0 ± 8.9                       | 96.0 ± 8.9         | <0.001  | 3212    |
| Sokolow-Lyon voltage-LVH        | 472 (14.7)        | 46 (45.5)                                  | 59 (31.7)                         | 79 (29.7)                        | 288 (10.8)         | <0.001  | 3212    |
| Cornell voltage, mm             | 15.8 ± 7.1        | 29.6 ± 8.4                                 | 16.8 ± 5.3                        | 26.5 ± 6.0                       | 14.2 ± 5.5         | <0.001  | 3212    |
| Cornell product, mm • ms        | 1811.9 ± 744.6    | 3468.9 ± 894.2                             | 1942.9 ± 533.8                    | 3018.5 ± 620.6                   | 1619.1 ± 541.3     | <0.001  | 3212    |

|                             |             |              |              |             |             |        |      |
|-----------------------------|-------------|--------------|--------------|-------------|-------------|--------|------|
| Cornell product-LVH         | 540 (16.8)  | 95 (94.1)    | 36 (19.4)    | 237 (89.1)  | 172 (6.5)   | <0.001 | 3212 |
| <b>Echo characteristics</b> |             |              |              |             |             |        |      |
| LVDd, cm                    | 4.65 ± 0.55 | 5.10 ± 0.63  | 5.29 ± 0.65  | 4.55 ± 0.53 | 4.60 ± 0.50 | <0.001 | 3212 |
| LVDs, cm                    | 3.10 ± 0.50 | 3.59 ± 0.75  | 3.68 ± 0.74  | 3.04 ± 0.49 | 3.05 ± 0.43 | <0.001 | 3212 |
| IVSTd, cm                   | 0.81 ± 0.15 | 1.01 ± 0.19  | 0.99 ± 0.16  | 0.82 ± 0.13 | 0.78 ± 0.14 | <0.001 | 3212 |
| LVPWd, cm                   | 0.79 ± 0.14 | 0.98 ± 0.18  | 0.96 ± 0.15  | 0.81 ± 0.12 | 0.77 ± 0.12 | <0.001 | 3212 |
| RWT                         | 0.34 ± 0.07 | 0.39 ± 0.09  | 0.37 ± 0.09  | 0.36 ± 0.07 | 0.34 ± 0.06 | <0.001 | 3212 |
| >0.42                       | 370 (11.5)  | 33 (32.7)    | 44 (23.7)    | 41 (15.4)   | 252 (9.5)   | <0.001 | 3212 |
| LVMI, g/m                   | 75.4 ± 21.7 | 122.3 ± 26.3 | 119.6 ± 16.4 | 77.0 ± 14.8 | 70.4 ± 16.0 | <0.001 | 3212 |
| LAD, cm                     | 3.48 ± 0.64 | 3.92 ± 0.65  | 4.00 ± 0.71  | 3.59 ± 0.67 | 3.42 ± 0.61 | <0.001 | 3210 |
| LAVI, ml/m <sup>2</sup>     | 22.2 ± 10.6 | 32.3 ± 15.1  | 32.4 ± 15.9  | 24.4 ± 10.3 | 21.0 ± 9.3  | <0.001 | 2901 |
| >34 ml/m <sup>2</sup>       | 293 (10.1)  | 32 (35.6)    | 53 (32.5)    | 32 (13.9)   | 176 (7.3)   | <0.001 | 2901 |
| EF, %                       | 61.9 ± 7.0  | 56.5 ± 11.1  | 56.8 ± 11.7  | 61.9 ± 8.0  | 62.5 ± 5.9  | <0.001 | 3212 |
| <50%*                       | 185 (5.8)   | 23 (22.8)    | 41 (22.0)    | 19 (7.1)    | 102 (3.8)   | <0.001 | 3212 |

Comparisons among 4 groups were performed using the chi-square test for categorical variables, and one-way analysis of variance for continuous variables. Values are number (%), mean ± SD. BMI=body mass index, EF=ejection fraction, HR=heart rate, IVSTd=diastolic interventricular septal wall thickness, LAVI=left atrial volume index, LVDd=left ventricular diastolic dimension, LVDs=left ventricular systolic dimension, LVH=left ventricular hypertrophy, LVMI=left ventricular mass index, LVPWd=diastolic left ventricular posterior



wall thickness, RWT=relative wall thickness, SD=standard deviation.

\*Potential risk-adjusting variables selected for cox proportional hazard model

**Supplemental Table 4. Crude and adjusted hazard ratio using Cornell voltage for ECG-LVH**

|                                        | Both ECG- and Echo-based LVH<br>N of patients with event/N of patients at risk (Cumulative 3-year incidence [%]) | Only Echo-based LVH<br>N of patients with event/N of patients at risk (Cumulative 3-year incidence [%]) | Only ECG-based LVH<br>N of patients with event/N of patients at risk (Cumulative 3-year incidence [%]) | No LVH<br>N of patients with event/N of patients at risk (Cumulative 3-year incidence [%]) | Variables                    | Unadjusted          |         | Adjusted            |         |
|----------------------------------------|------------------------------------------------------------------------------------------------------------------|---------------------------------------------------------------------------------------------------------|--------------------------------------------------------------------------------------------------------|--------------------------------------------------------------------------------------------|------------------------------|---------------------|---------|---------------------|---------|
|                                        |                                                                                                                  |                                                                                                         |                                                                                                        |                                                                                            |                              | HR (95% CI)         | P value | HR (95% CI)         | P value |
| A composite of all-cause death or MACE | 26/101 (31.4)                                                                                                    | 53/186 (33.8)                                                                                           | 43/266 (20.1)                                                                                          | 329/2659 (15.8)                                                                            | Both ECG- and Echo-based LVH | 2.22<br>(1.55-3.18) | <0.001  | 1.68<br>(1.15-2.46) | 0.008   |
|                                        |                                                                                                                  |                                                                                                         |                                                                                                        |                                                                                            | Only Echo-based LVH          | 2.30<br>(1.75-3.01) | <0.001  | 1.66<br>(1.24-2.21) | <0.001  |
|                                        |                                                                                                                  |                                                                                                         |                                                                                                        |                                                                                            | Only ECG-based LVH           | 1.21<br>(0.90-1.63) | 0.20    | 1.17<br>(0.86-1.57) | 0.32    |
|                                        |                                                                                                                  |                                                                                                         |                                                                                                        |                                                                                            | No LVH                       | 1 (reference)       |         | 1 (reference)       |         |

CI=confidence interval, HR=hazard ratio, MACE= major adverse cardiac events

**Supplemental Table 5. Patient characteristics using Sokolow-Lyon voltage for ECG-LVH**

|                                 | Total<br>(n=3212) | Both ECG- and<br>Echo-based LVH<br>(n=105) | Only<br>Echo-based LVH<br>(n=182) | Only<br>ECG-based LVH<br>(n=367) | No LVH<br>(n=2558) | P value | Total N |
|---------------------------------|-------------------|--------------------------------------------|-----------------------------------|----------------------------------|--------------------|---------|---------|
| <b>Clinical characteristics</b> |                   |                                            |                                   |                                  |                    |         |         |
| Age*, years                     | 64.5 ± 15.9       | 68.7 ± 12.0                                | 70.1 ± 14.1                       | 66.7 ± 15.4                      | 63.6 ± 16.1        | <0.001  | 3212    |
| >70 years,                      | 1371 (42.7)       | 51 (48.6)                                  | 108 (59.3)                        | 182 (49.6)                       | 1030 (40.3)        | <0.001  | 3212    |
| Women*                          | 1512 (47.0)       | 46 (43.8)                                  | 112 (61.5)                        | 126 (34.3)                       | 1228 (48.0)        | <0.001  | 3212    |
| BMI kg/m <sup>2</sup>           | 23.2 ± 4.2        | 23.5 ± 4.6                                 | 23.8 ± 5.3                        | 22.5 ± 3.7                       | 23.2 ± 4.2         | 0.003   | 3202    |
| >25 kg/m <sup>2</sup> *         | 915 (28.6)        | 33 (31.4)                                  | 67 (36.8)                         | 77 (21.0)                        | 738 (29.0)         | <0.001  | 3202    |
| Diabetes*                       | 983 (30.6)        | 46 (43.8)                                  | 75 (41.2)                         | 110 (30.0)                       | 752 (29.4)         | <0.001  | 3212    |
| Hypertension*                   | 1771 (55.1)       | 85 (81.0)                                  | 149 (81.9)                        | 223 (60.8)                       | 1314 (51.4)        | <0.001  | 3212    |
| Dyslipidemia*                   | 941 (29.3)        | 42 (40.0)                                  | 76 (41.8)                         | 98 (26.7)                        | 725 (28.3)         | <0.001  | 3212    |
| Ischemic heart disease*         | 979 (30.5)        | 45 (42.9)                                  | 82 (45.1)                         | 108 (29.4)                       | 744 (29.1)         | <0.001  | 3212    |
| Chronic kidney disease*         | 449 (14.0)        | 38 (36.2)                                  | 62 (34.1)                         | 59 (16.1)                        | 290 (11.3)         | <0.001  | 3212    |
| Atrial fibrillation*            | 267 (8.3)         | 7 (6.7)                                    | 22 (12.1)                         | 36 (9.8)                         | 202 (7.9)          | 0.14    | 3212    |
| <b>ECG characteristics</b>      |                   |                                            |                                   |                                  |                    |         |         |
| Heart rate, bpm                 | 71.6 ± 15.6       | 71.6 ± 14.7                                | 72.6 ± 16.8                       | 70.1 ± 16.4                      | 71.7 ± 15.4        | 0.22    | 3212    |
| QRS duration                    | 96.6 ± 9.0        | 102.3 ± 9.2                                | 99.1 ± 9.4                        | 99.0 ± 8.5                       | 95.8 ± 8.9         | <0.001  | 3212    |
| Cornell voltage, mm             | 15.8 ± 7.1        | 24.0 ± 10.8                                | 19.7 ± 7.3                        | 19.0 ± 8.3                       | 14.8 ± 6.2         | <0.001  | 3212    |
| Cornell voltage-LVH             | 367 (11.4)        | 46 (43.8)                                  | 55 (30.2)                         | 79 (21.5)                        | 187 (7.3)          | <0.001  | 3212    |
| Cornell product, mm • ms        | 1811.9 ± 744.6    | 2760.3 ± 1230.0                            | 2318.2 ± 796.2                    | 2085.1 ± 871.5                   | 1697.8 ± 634.2     | <0.001  | 3212    |

|                             |             |              |              |             |             |        |      |
|-----------------------------|-------------|--------------|--------------|-------------|-------------|--------|------|
| Cornell product-LVH         | 540 (16.8)  | 57 (54.3)    | 74 (40.7)    | 114 (31.1)  | 295 (11.5)  | <0.001 | 3212 |
| <b>Echo characteristics</b> |             |              |              |             |             |        |      |
| LVDd, cm                    | 4.65 ± 0.55 | 5.23 ± 0.61  | 5.22 ± 0.67  | 4.69 ± 0.51 | 4.58 ± 0.50 | <0.001 | 3212 |
| LVDs, cm                    | 3.10 ± 0.50 | 3.69 ± 0.75  | 3.63 ± 0.74  | 3.15 ± 0.48 | 3.04 ± 0.42 | <0.001 | 3212 |
| IVSTd, cm                   | 0.81 ± 0.15 | 1.03 ± 0.19  | 0.98 ± 0.16  | 0.83 ± 0.13 | 0.78 ± 0.13 | <0.001 | 3212 |
| LVPWd, cm                   | 0.79 ± 0.14 | 1.00 ± 0.19  | 0.95 ± 0.15  | 0.82 ± 0.12 | 0.77 ± 0.12 | <0.001 | 3212 |
| RWT                         | 0.34 ± 0.07 | 0.39 ± 0.10  | 0.37 ± 0.08  | 0.36 ± 0.07 | 0.34 ± 0.06 | <0.001 | 3212 |
| >0.42                       | 370 (11.5)  | 33 (31.4)    | 44 (24.2)    | 54 (14.7)   | 239 (9.3)   | <0.001 | 3212 |
| LVMI, g/m                   | 75.4 ± 21.7 | 124.2 ± 21.8 | 118.5 ± 19.3 | 79.6 ± 16.1 | 69.7 ± 15.6 | <0.001 | 3212 |
| LAD, cm                     | 3.48 ± 0.64 | 3.95 ± 0.62  | 3.98 ± 0.73  | 3.60 ± 0.64 | 3.41 ± 0.61 | <0.001 | 3210 |
| LAVI, ml/m <sup>2</sup>     | 22.2 ± 10.6 | 29.8 ± 10.3  | 34.0 ± 17.9  | 24.4 ± 9.9  | 20.8 ± 9.3  | <0.001 | 2901 |
| >34 ml/m <sup>2</sup>       | 293 (10.1)  | 29 (30.2)    | 56 (35.7)    | 48 (14.3)   | 160 (6.9)   | <0.001 | 2901 |
| EF, %                       | 61.9 ± 7.0  | 56.3 ± 11.8  | 56.9 ± 11.3  | 61.3 ± 7.5  | 62.6 ± 5.9  | <0.001 | 3212 |
| <50%*                       | 185 (5.8)   | 23 (21.9)    | 41 (22.5)    | 22 (6.0)    | 99 (3.9)    | <0.001 | 3212 |

Comparisons among 4 groups were performed using the chi-square test for categorical variables, and one-way analysis of variance for continuous variables. Values are number (%), mean ± SD. BMI=body mass index, EF=ejection fraction, HR=heart rate, IVSTd=diastolic interventricular septal wall thickness, LAVI=left atrial volume index, LVDd=left ventricular diastolic dimension, LVDs=left ventricular systolic dimension, LVH=left ventricular hypertrophy, LVMI=left ventricular mass index, LVPWd=diastolic left ventricular posterior

wall thickness, RWT=relative wall thickness, SD=standard deviation.

\*Potential risk-adjusting variables selected for cox proportional hazard model

**Supplemental Table 6. Crude and adjusted hazard ratio using Sokolow-Lyon voltage for ECG-LVH**

|                                        | Both ECG- and Echo-based LVH<br>N of patients with event/N of patients at risk (Cumulative 3-year incidence [%]) | Only Echo-based LVH<br>N of patients with event/N of patients at risk (Cumulative 3-year incidence [%]) | Only ECG-based LVH<br>N of patients with event/N of patients at risk (Cumulative 3-year incidence [%]) | No LVH<br>N of patients with event/N of patients at risk (Cumulative 3-year incidence [%]) | Variables                    | Unadjusted          |         | Adjusted            |         |
|----------------------------------------|------------------------------------------------------------------------------------------------------------------|---------------------------------------------------------------------------------------------------------|--------------------------------------------------------------------------------------------------------|--------------------------------------------------------------------------------------------|------------------------------|---------------------|---------|---------------------|---------|
|                                        |                                                                                                                  |                                                                                                         |                                                                                                        |                                                                                            |                              | HR (95% CI)         | P value | HR (95% CI)         | P value |
| A composite of all-cause death or MACE | 27/105 (31.0)                                                                                                    | 52/182 (34.2)                                                                                           | 53/367 (18.9)                                                                                          | 319/2558 (15.8)                                                                            | Both ECG- and Echo-based LVH | 2.07<br>(1.44-2.97) | <0.001  | 1.48<br>(1.03-2.15) | 0.04    |
|                                        |                                                                                                                  |                                                                                                         |                                                                                                        |                                                                                            | Only Echo-based LVH          | 2.42<br>(1.84-3.18) | <0.001  | 1.73<br>(1.29-2.32) | <0.001  |
|                                        |                                                                                                                  |                                                                                                         |                                                                                                        |                                                                                            | Only ECG-based LVH           | 1.22<br>(0.94-1.59) | 0.13    | 1.00<br>(0.77-1.30) | 0.99    |
|                                        |                                                                                                                  |                                                                                                         |                                                                                                        |                                                                                            | No LVH                       | 1 (reference)       |         | 1 (reference)       |         |

CI=confidence interval, HR=hazard ratio, MACE= major adverse cardiac events

## Supplemental Figure 1.

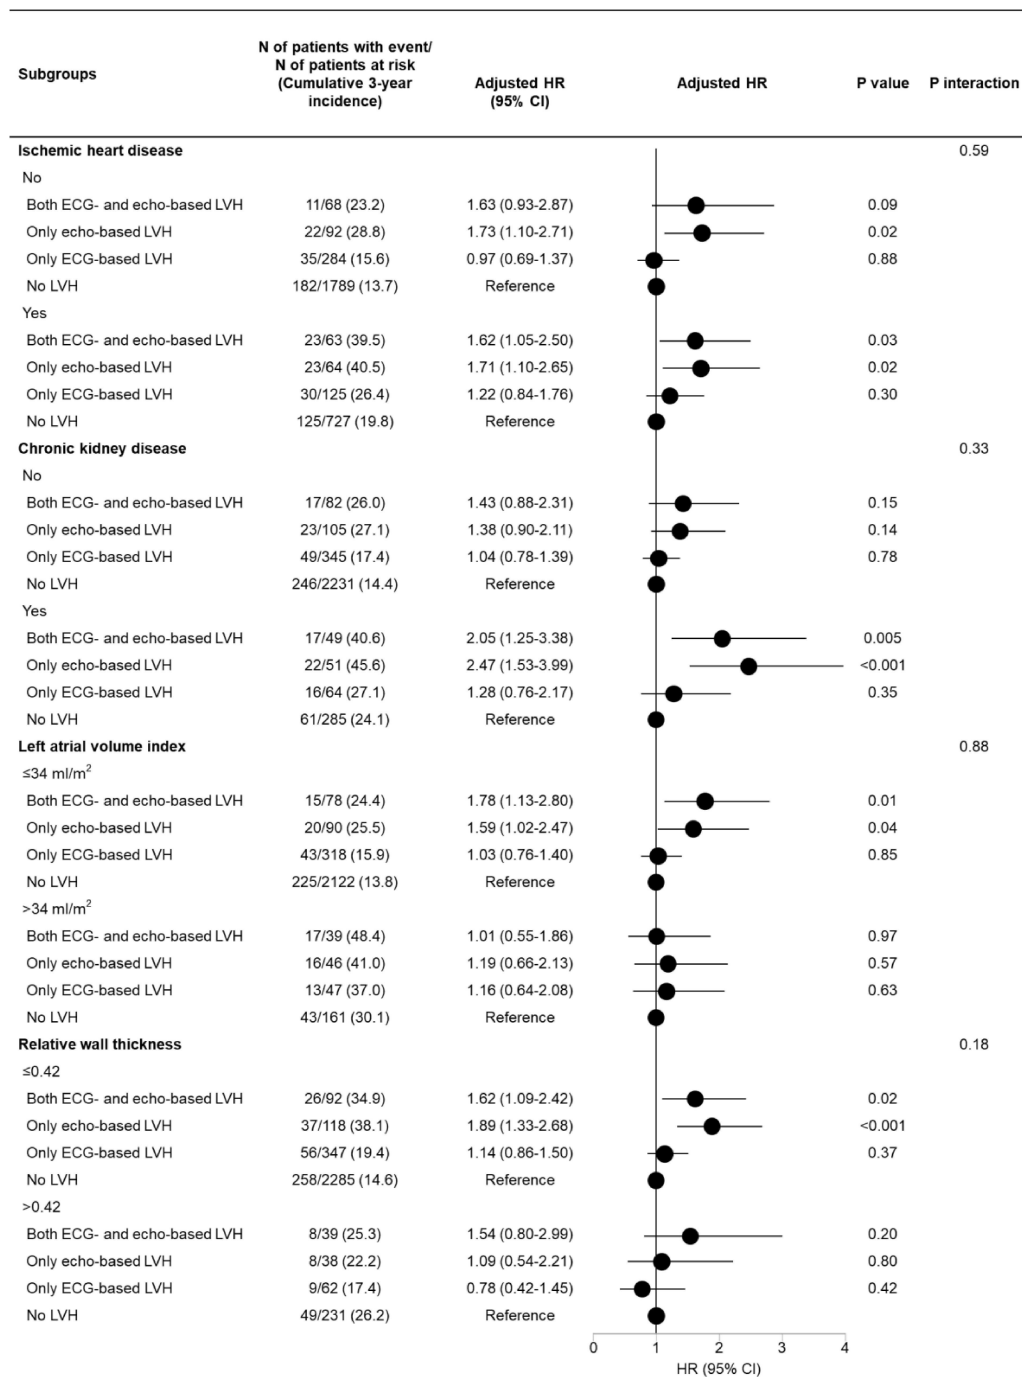

Supplemental Figure 2.

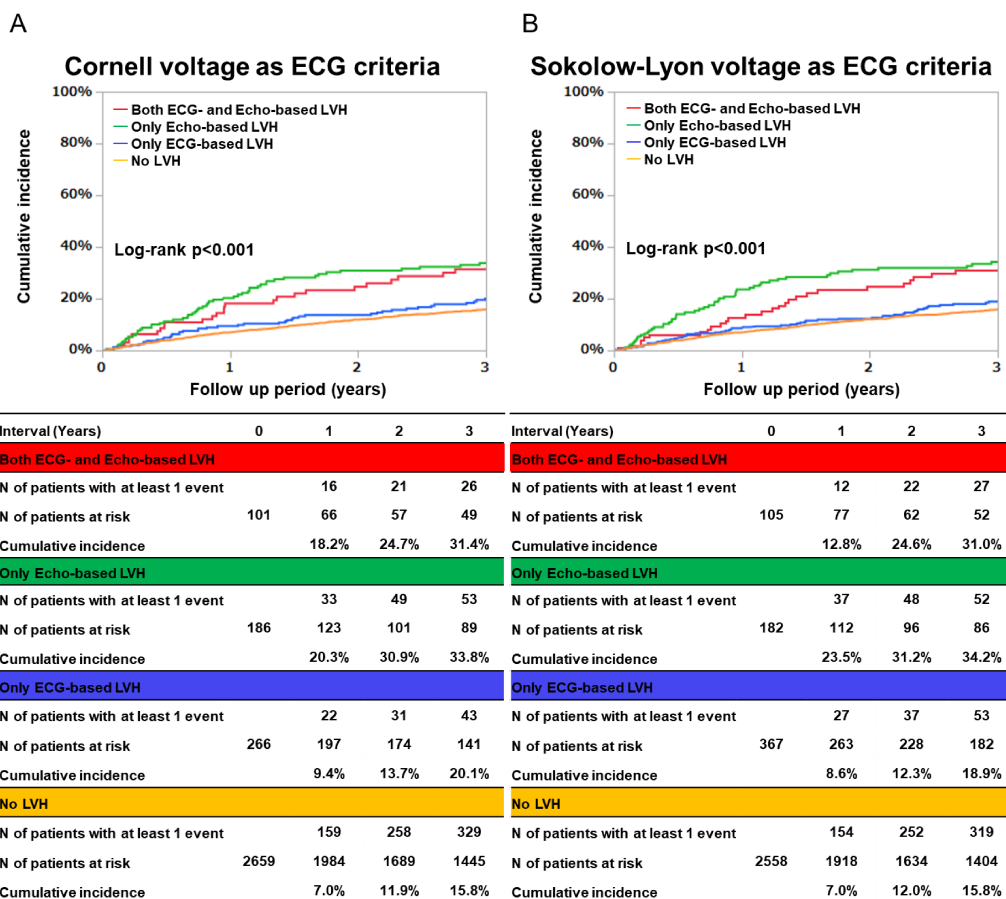



**Supplemental Figure legends****Supplemental Figure 1. Subgroup analyses.**

ECG=electrocardiogram, HR=hazard ratio, LVH=left ventricular hypertrophy.

**Supplemental Figure 2. Cumulative incidence of the primary outcome measure (a composite of all-cause death or MACE) using Cornell voltage for ECG-LVH and Sokolow-Lyon voltage for ECG-LVH.**

A; Cornell voltage as ECG criteria, B; Sokolow-Lyon voltage as ECG criteria.

ECG=electrocardiogram, LVH=left ventricular hypertrophy.
